# Supplementary material for: Combination of Xuesaitong and Aspirin Based on the Antiplatelet Effect and Gastrointestinal Injury: Study Protocol for a Randomized Controlled Noninferiority Trial
Source: Evid Based Complement Alternat Med. 2021 Jul 13;2021:5552506. doi: 10.1155/2021/5552506 (PMC8294960; doi:10.1155/2021/5552506)
Supplement: Supplementary Materials — 1: approval document of ethics. 2: SPIRIT reporting checklist (Standard Protocol Items Recommendations for Interventional Trials). [file 5552506.f1.zip]

Archive with 2 entries (2 files):
- 5552506.f1/Supplementary file 1 approval document of ethics.docx
- 5552506.f1/Supplementary file 2 SPIRIT checklist.docx
